# Supplementary material for: Enhancement of hydrodesulfurization of 4,6-dimethyldibenzothiophene catalyzed by CoMo catalysts supported on carbon-covered γ-Al2O3
Source: Royal Society of Chemistry journal article supplement (doi:10.1039/c4cy00814f), 2014-09-17
Supplement: c4cy00814f1.pdf [file c4cy00814f1.pdf]

## Supporting information

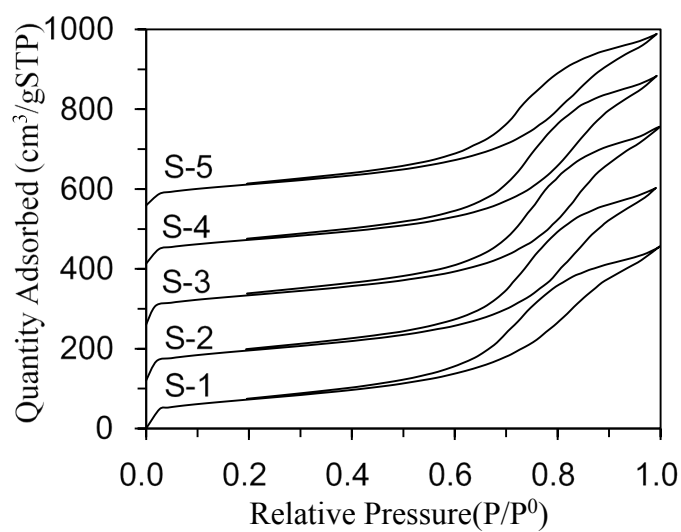

**Figure S1.** N<sub>2</sub> adsorption/desorption isotherms for different supports.
